# Supplementary material for: Protein Analysis of A. halleri and N. caerulescens Hyperaccumulators When Exposed to Nano and Ionic Forms of Cd and Zn
Source: Nanomaterials (Basel). 2022 Nov 28;12(23):4236. doi: 10.3390/nano12234236 (PMC9736429; doi:10.3390/nano12234236)
Supplement: Supplementary file 1 [file nanomaterials-12-04236-s001.zip › supplementary SM2.xlsx]

## Sheet: A.halleri
Protein analysis of A. halleri and N. caerulescens hyperaccumulators exposed to nano and ionic forms of Cd and Zn. Gallo V., Serianni V., Imperiale D., Marmiroli M., Marmiroli N. Supplementary Table S1: MALDI-TOF/TOF data associated with differentially expressed proteins identified by 2D SDS-PAGE in A. halleri
Spot n° a	Protein name b	Accession no. c	entry name d	Gene name e	MW f	pI g	score h	id. peptide i	seq. cov.% j	mean CTR	mean CdS QDs	mean CdSO4
3207	14-3-3-like protein B	Q96451	1433B_SOYBN	GF14B	28018 Da	4.75	22	3	0.13	0.1073	0.1961	0.0866
7902	ABC transporter B family member 28	Q8LPQ6	AB28B_ARATH	ABCB28	78448 Da	9.13	37	13	0.21	0.1508	0.0184	0.0098
8707	Aldo-keto reductase family 4 member C11	Q9M338	AKRCB_ARATH	AKR4C11	35185 Da	6.46	43	12	0.38	0.4176	0.0699	0.1202
6102	ATP synthase delta chain	Q9SSS9	ATPD_ARATH	ATPD	26768 Da	8.96	58	9	0.42	0.6123	0.9147	0.1018
5703	ATP synthase subunit alpha	G1C2Z0	ATPA_ARATH	atp1	55733 Da	5.21	63	14	0.27	0.8175	0.3379	0.4062
8505	ATP-dependent Clp protease ATP-binding subunit CLPT1	Q93WL3	CLPT1_ARATH	CLPT1	26148 Da	9.24	55	11	0.55	0.1622	0.0049	0.0101
2301	AT-rich interactive domain-containing protein 5	Q0WNR6	ARID5_ARATH	ARID5	48181 Da	5.19	19	3	0.06	0.2171	0.1595	0.0539
8203	BURP domain protein RD22	Q08298	RD22_ARATH	RD22	42632 Da	9.42	39	10	0.11	2.9907	7.4062	9.2248
8301	Cinnamoyl-CoA reductase 2	Q9SAH9	CCR2_ARATH	CCR2	36994 Da	6.40	39	7	0.18	0.1317	0.0379	0.006
9105	Cysteine proteinase inhibitor 2	Q8L5T9	CYT2_ARATH	CYS2	16137 Da	10.08	38	9	0.7	0.1476	0.4908	0.3221
5506	Cytochrome P450 82G1	Q9LSF8	C82G1_ARATH	CYP82G1	58932 Da	9.12	31	11	0.2	0.9156	0.7001	1.4848
3603	D-2-hydroxyglutarate dehydrogenase	O23240	D2HDH_ARATH	D2HGDH	61920 Da	6.52	28	4	0.14	4.1185	1.6218	2.6672
8502	DEAD-box ATP-dependent RNA helicase 38	Q93ZG7	RH38_ARATH	RH38	55634 Da	5.18	35	13	0.2	1.1875	0.1507	0.0461
4203	Defensin-like protein 249	P82626	DF249_ARATH	SCRL7	10757 Da	8.71	19	2	0.11	0.1463	0.3673	0.157
1002	Defensin-like protein 8	P82782	DEF08_ARATH	LCR73	9436 Da	8.16	26	3	0.12	1.7875	5.1916	8.0464
4403	Delta-9 desaturase-like 2 protein	Q9LND8	ADSL2_ARATH	At1g06100	35618 Da	9.46	29	6	0.14	0.2721	0.6652	0.3002
4401	DNA repair protein recA homolog 2	Q8RY99	RECAM_ARATH	At3g10140	43326 Da	8.06	42	9	0.19	0.1786	0.0141	0.0183
1103	E3 ubiquitin-protein ligase	Q8LE94	RING3_ARATH	At3g02290	26925 Da	5.44	16	2	0.16	0.113	0.1074	0.0177
1504	Enoyl-CoA delta isomerase 3	O23300	ECI3_ARATH	ECI3	25693 Da	6.75	13	2	0.05	0.0359	0.0184	0.2361
2102	F-box protein At3g18320	Q9LS58	FB158_ARATH	At3g18320	36212 Da	8.33	34	5	0.17	0.1742	0.1826	0.0944
7404	Glutathione S-transferase U18	Q9FUS9	GSTUI_ARATH	GSTU18	26065 Da	6.66	51	10	0.36	0.0552	0.0065	0.0236
3209	Glutathione S-transferase U24	Q9SHH6	GSTUO_ARATH	GSTU24	25461 Da	5.85	19	2	0.11	0.0559	0.1371	0.0042
4204	GTP-binding protein SAR1A	O04834	SAR1A_ARATH	SAR1A	22011 Da	6.97	23	3	0.22	0.2855	1.3305	0.9884
3104	Heavy metal-associated isoprenylated plant protein 8	Q9M8T7	HIP8_ARATH	HIPP08	28254 Da	9.35	17	7	0.11	0.0056	0.2121	0.2968
4402	Metal tolerance protein 1	Q9ZT63	MTP1_ARATH	MTP1	44142 Da	6.13	27	4	0.15	0.7147	0.4269	0.2946
3204	Nicotinamidase 3	Q9FMX8	NIC3_ARATH	NIC3	22501 Da	5.97	11	2	0.07	0.1576	0.3294	0.2128
7804	Pentatricopeptide repeat-containing protein At1g28690	Q1PFQ9	PPR62_ARATH	PCMP-E34	58728 Da	8.75	36	12	0.19	0.1263	0.0128	0.0038
4205	Pentatricopeptide repeat-containing protein At2g15630	Q9ZQF1	PP152_ARATH	At2g15630	71911 Da	7.10	67	18	0.36	0.0371	0.1145	0.1955
2302	Peroxidase 10	Q9FX85	PER10_ARATH	PER10	38462 Da	6.17	15	3	0.06	0.3112	0.0631	0.163
7502	Probable protein phosphatase 2C 1	Q9LR65	P2C01_ARATH	PPC6-6	51798 Da	5.24	41	11	0.3	0.8602	0.2246	0.3032
7601	Probable trehalose-phosphate phosphatase 10	O80738	TPP10_ARATH	TPP10	40753 Da	6.80	52	15	0.35	0.3213	0.1905	0.3854
7001	Putative defensin-like protein 121	P82769	DF121_ARATH	LCR55	8969 Da	7.51	29	4	0.46	0.1139	0.0306	0.1147
710	Ras-related protein RABE1d	Q9LZD4	RAE1D_ARATH	ECI3	24193 Da	7.63	9	2	0.05	0.1969	0.0059	0.0813
404	Ribose-phosphate pyrophosphokinase 2	Q42583	KPRS2_ARATH	PRS2	43819 Da	8.48	19	3	0.09	0.0721	0.0084	0.0134
3602	Ribulose bisphosphate carboxylase large chain	O03042	RBL_ARATH	rbcL	53435 Da	5.88	106	21	0.31	5.9437	2.0107	1.6485
4406	Serine/threonine protein phosphatase 2A 57 kDa regulatory subunit B' beta isoform	O04376	2A5B_ARATH	B'BETA	57892 Da	6.19	32	11	0.22	0.0987	0.3032	0.4417
2105	Sm-like protein LSM1A	Q945P8	LSM1A_ARATH	LSM1A	14710 Da	4.81	20	2	0.17	0.4121	1.7721	0.0831
9103	Succinate dehydrogenase subunit 4	Q941A0	SDH4_ARATH	SDH4	16831 Da	10.26	58	8	0.39	0.0285	0.2104	0.0725
7305	Thioredoxin-like 2-1	Q8LEK4	TRL21_ARATH	At4g26160	24679 Da	8.72	39	7	0.31	0.0221	0.2514	0.0647
2003	Transcription factor bHLH168	Q9XIJ1	BH168_ARATH	BHLH168	20128 Da	9.71	31	4	0.35	1.183	1.7167	0.1052
4105	Transcription factor CPC	O22059	CPC_ARATH	CPC	11435 Da	9.60	12	3	0.09	0.2695	0.0747	0.0645
1403	transcription factor KAN4	Q9FJV5	KAN4_ARATH	KAN4	31056 Da	7.31	15	2	0.18	0.2463	0.0924	0.1038
4803	Tyrosine decarboxylase 1	F4JM08	F4JM08_ARATH	ELI5	54902 Da	5.89	29	7	0.13	0.048	0.0254	0.0185
Proteins abundance varied in response to CdS QDs treatments.
Notes:
a spot number assigned following 2D SDS-PAGE separation;
b putative protein identification,
c accession number: upon integration into UniProtKB, each entry is assigned a unique accession number, which is called ‘Primary (citable) accession number’.
d entry name: each reviewed entry is assigned a unique entry name upon integration into UniProtKB/Swiss-Prot.
e encoding gene
f, g, h, i, j Shown are the molecular weight (MW), Isoelectric point (pI), maximal score (score), maximal identified peptides (id. peptides), sequence coverage (percentage of coverage of the matching peptide sequence tags derived from MASCOT analysis) of the proteins.

## Sheet: N. caerulescens 
Protein analysis of A. halleri and N. caerulescens hyperaccumulators exposed to nano and ionic forms of Cd and Zn. Gallo V., Serianni V., Imperiale D., Marmiroli M., Marmiroli N. Supplementary Table S2: MALDI-TOF/TOF data associated with differentially expressed proteins identified by 2D SDS-PAGE in N. caerulescens
Spot n° a	Protein name b	Accession no. c	entry name d	Gene name e	MW f	pI g	score h	id. peptide i	seq. cov.% j	mean CTR	mean CdS QDs	mean CdSO4
5503	11-beta-hydroxysteroid dehydrogenase-like 3	Q9STY7	HSD3_ARATH	HSD3	35210	8.65	29	7	0.22	0.305184	0.200051	0.0350898
3104	2S seed storage protein 4	P15460	2SS4_ARATH	AT2S4	19727	7.46	37	7	0.28	0.395028	0.001	1.20793
6106	30S ribosomal protein S12, chloroplastic	P62126	RR12_ARATH	rps12-A	14346	11.54	31	7	0.52	2.2368	1.03453	0.587211
4107	30S ribosomal protein S19, chloroplastic	P56808	RR19_ARATH	rps19	11675	10.32	19	3	0.11	0.001	1.22594	1.9818
7705	3-ketoacyl-CoA synthase 12	Q9SIB2	KCS12_ARATH	KCS12	54623	8.99	42	10	0.18	0.247686	2.58675	1.10015
3408	40S ribosomal protein S3a-1	Q9CAV0	RS3A1_ARATH	RPS3AA	30060	9.78	19	3	0.11	1.24765	1.24614	0.510679
3604	ACT domain-containing protein ACR7	Q8LJW1	ACR7_ARATH	ACR7	51228	5.75	12	3	0.07	0.107521	0.297753	0.103405
4608	Alpha-1,6-mannosyl-glycoprotein 2-beta-N-acetylglucosaminyltransferase	Q9FT88	MGAT2_ARATH	GNT2	49486	7.99	17	7	0.12	0.434267	0.17689	0.001
8604	Arogenate dehydratase/prephenate dehydratase 6, chloroplastic	Q9SGD6	AROD6_ARATH	ADT6	45059	6.11	30	5	0.2	0.0835057	0.153218	0.001
7405	ATP synthase delta chain, chloroplastic	Q9SSS9	ATPD_ARATH	ATPD	26768	8.96	66	10	0.53	0.423589	0.198672	0.398423
7608	ATP-dependent Clp protease proteolytic subunit-related protein 1, chloroplastic	Q9XJ35	CLPR1_ARATH	CLPR1	42942	8.81	22	8	0.25	0.604308	0.162704	0.367881
7601	BTB/POZ domain-containing protein At3g50780	Q9SVM0	Y3078_ARATH	At3g50780	59243	7.85	51	44	0.31	0.347472	2.69236	0.829997
1401	Calcium-binding protein CML31, probable	Q9SJN6	CML31_ARATH	CML31	16792	4.19	19	4	0.29	0.796352	0.188956	0.965268
6901	Chaperone protein ClpB1	P42730	CLPB1_ARATH	CLPB1	101460	5.81	37	25	0.22	0.050504	0.343249	0.142625
4704	COP9 signalosome complex subunit 2	Q8W207	CSN2_ARATH	CSN2	51496	5.43	18	6	0.16	1.16583	0.919747	2.12651
2502	Cyclin-A3-2	Q9C6A9	CCA32_ARATH	CYCA3-2	42834	8.85	22	3	0.04	0.51994	0.273662	0.0229481
4107	Cytochrome b-c1 complex subunit 7-2	F4JWS8	QCR72_ARATH	QCR7-2	14587	9.84	17	2	0.09	0.001	1.22594	1.9818
4104	Defensin-like protein 39, putative	Q2V460	DEF39_ARATH	At2g24625	10588	9.41	10	1	0.21	0.687799	1.80939	0.001
6604	Dihydropyrimidine dehydrogenase (NADP+), chloroplastic	Q9LVI9	DPYD_ARATH	PYD1	47216	6.37	29	12	0.26	0.159185	0.178244	0.001
9703	E3 ubiquitin-protein ligase ARI9, probable	Q9SKC3	ARI9_ARATH	ARI9	64529	4.96	28	6	0.15	0.185143	0.0852949	0.010545
7602	E3 ubiquitin-protein ligase PRT1	Q8LBL5	PRT1_ARATH	PRT1	47503	4.95	35	12	0.24	0.128258	0.288632	0.001
3408	Expansin-A7	Q9LN94	EXPA7_ARATH	EXPA7	29229	9.33	11	2	0.03	1.24765	1.24614	0.510679
9406	F-box protein At1g61060, putative	Q9C948	FB70_ARATH	At1g61060	30920	8.49	23	5	0.08	0.140563	0.380324	0.001
8501	F-box protein At3g18320	Q9LS58	FB158_ARATH	At3g18320	36212	8.33	23	10	0.25	0.384617	0.891129	0.213053
8505	F-box/kelch-repeat protein At3g27910, putative	Q9LS58	FBK71_ARATH	At3g27910	44034	8.50	15	3	0.04	0.317329	0.167348	0.214568
7706	FRIGIDA-like protein 3	Q67ZB3	FRL3_ARATH	FRL3	63032	6.60	26	13	0.15	0.0967131	1.12217	0.2511
4401	Heat stress transcription factor B-3	O22230	HSFB3_ARATH	HSFB3	28575	5.28	15	3	0.18	0.252953	0.226697	0.0261584
7508	Jasmonate O-methyltransferase	Q9AR07	JMT_ARATH	JMT	43758	5.18	45	15	0.21	0.001	0.593177	0.65633
3205	Late embryogenesis abundant protein 46	Q9FG31	LEA46_ARATH	LEA46	16169	9.43	43	11	0.5	0.888886	0.199412	0.949243
4607	Mitogen-activated protein kinase kinase 7	Q9LPQ3	M2K7_ARATH	MKK7	34706	8.38	19	2	0.1	0.304326	0.34254	0.001
4305	NAD(P)H-quinone oxidoreductase subunit K, chloroplastic	P56756	NDHK_ARATH	ndhK	22754	7.62	10	2	0.05	0.39213	0.425096	0.152376
4102	NADH dehydrogenase [ubiquinone] 1 beta subcomplex subunit 7	Q9SKC9	NDUB7_ARATH	At2g02050	11960	7.66	16	2	0.16	0.989227	0.001	1.04705
2206	Nascent polypeptide-associated complex subunit beta	Q9CAT7	BTF3L_ARATH	At1g73230	17993	5.91	18	3	0.25	3.86912	3.34501	4.48976
1402	NDR1/HIN1-like protein 26	Q9FI03	NHL26_ARATH	NHL26	24067	9.65	17	3	0.07	1.32541	1.00906	1.5475
3702	Patellin-3	Q56Z59	PATL3_ARATH	PATL3	56298	5.21	15	5	0.05	0.373795	0.162286	0.222043
9805	Pentatricopeptide repeat-containing protein At2g40720	Q7XJN6	PP197_ARATH	PCMP-E26	96756	6.37	24	11	0.11	0.0882985	0.369556	0.896516
6703	Pentatricopeptide repeat-containing protein At3g48250	Q9STK5	PP269_ARATH	At3g48250	71386	8.19	44	22	0.35	0.610916	0.837686	0.528737
1401	Peroxisomal membrane protein 11-A	Q9FZF1	PX11A_ARATH	PEX11A	26636	9.98	22	5	0.13	0.796352	0.188956	0.965268
5303	PHD finger protein ALFIN-LIKE 1	Q9FFF5	ALFL1_ARATH	AL1	27889	5.71	21	3	0.06	0.432012	0.362847	0.76082
4608	Phosphatidate cytidylyltransferase 2	O49639	CDS2_ARATH	CDS2	48558	9.44	18	2	0.09	0.434267	0.17689	0.001
307	Probable glutathione S-transferase U19	Q9ZRW8	GSTUJ_ARATH	GSTU19	25954	5.90	17	2	0.14	0.0396281	0.51914	0.702349
4503	Protein SHI RELATED SEQUENCE 1	Q9SD40	SRS1_ARATH	SRS1	38841	7.12	19	2	0.08	0.373634	0.247662	0.001
1206	Protein TIFY 5B	O64687	TIF5B_ARATH	TIFY 5B	17134	7.01	21	2	0.08	0.437667	0.369831	0.001
7708	Protein trichome birefringence-like 6	Q9LZQ1	TBL6_ARATH	TBL6	55117	9.45	25	8	0.15	0.001	0.0920605	0.0568679
9407	Ras-related protein RABA1c	Q9FK68	RAA1C_ARATH	RABA1C	23969	5.60	27	5	0.12	0.0179536	1.06823	0.495051
5602	Ribulose bisphosphate carboxylase large chain	O03042	RBL_ARATH	rbcL	53435	5.88	153	35	0.66	2.53779	4.81741	2.18272
2204	Serine carboxypeptidase-like 52, putative	Q8S8P0	SCP52_ARATH	SCPL52	21290	7.01	16	2	0.13	3.32605	1.67991	3.66287
2201	Thioredoxin F1, chloroplastic	Q9XFH8	TRXF1_ARATH	At3g02730	21239	9.17	26	4	0.27	1.12992	0.296377	3.14862
9401	Transcription factor bHLH92	Q9FIX5	BH092_ARATH	BHLH92	29051	9.57	34	15	0.41	0.0938048	0.161864	0.001
7401	Transcription factor IND	O81313	IND_ARATH	IND	23105	7.12	27	4	0.2	0.487283	0.213764	0.475821
4604	Transcription factor SRM1	Q9FNN6	SRM1_ARATH	SRM1	31852	6.32	26	5	0.13	0.495495	0.277582	0.358182
7502	Transcription initiation factor TFIID subunit 15	Q9AST1	TAF15_ARATH	TAF15	41707	8.03	24	6	0.16	0.657638	0.308203	0.565716
9407	tRNA-splicing endonuclease subunit Sen2-1	Q9M1E8	SEN21_ARATH	SEN1	27741	8.42	10	2	0.08	0.0179536	1.06823	0.495051
9403	Ubiquinone biosynthesis protein COQ4 homolog, mitochondrial	Q9ZPR0	COQ4_ARATH	At2g03690	26033	8.44	33	7	0.15	0.309152	1.22483	0.621011
9801	Ubiquitin domain-containing protein DSK2a	Q9SII9	DSK2A_ARATH	DSK2A	57306	4.69	13	3	0.11	0.155646	0.290446	2.67268
4105	Uncharacterized mitochondrial protein AtMg00280	P93292	M280_ARATH	AtMg00280	12884	9.14	16	4	0.2	1.29125	1.46217	0.001
6807	Vacuolar protein sorting-associated protein 52	Q94KD3	VP52A_ARATH	VPS52	81286	5.24	29	12	0.14	0.001	0.172687	0.0929513
1111	Vascular-related unknown protein 3	Q56YT7	VUP3_ARATH	VUP3	14794	4.47	11	1	0.16	0.001	0.346072	0.623354
4303	Vesicle transport v-SNARE 12	Q9SEL5	VTI12_ARATH	VTI12	25212	9.06	25	5	0.18	0.639464	0.279702	0.539412
5307	YlmG homolog protein 1-2, chloroplastic	Q9SUE0	YMG12_ARATH	YLMG1-2	23747	11.28	11	1	0.14	0.001	0.3627	0.001
8502	Zinc finger protein WIP3	Q94AV5	ZWIP3_ARATH	WIP3	39369	9.02	26	9	0.24	0.631768	0.276324	0.58819
